# Supplementary material
Source: publisher site journal article supplement (https://www.spandidos-publications.com/6311/downloadSupplementary)

Figure S1. Representative clinical indications of the recruited patients. (A) Hands of the patient in Case 1 (15 years old, female): Hyperproliferation and hyperkeratosis. (B) Feet of the patient in Case 2 (4 months old, male): Skin scaling with various degrees of thickening and desquamation. (C) Hands and (D) lateral calf of the patient in Case 3 (17 years old, female): Xerosis and scaling of the skin. (E) Thigh, knee and (F) abdomen of the patient in Case 6 (1 month old, male): Hyperkeratosis and dry-scaly skin. Clinical images of only part of the patients were included based on the patients' consent.

A

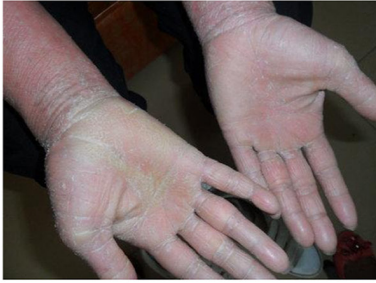

B

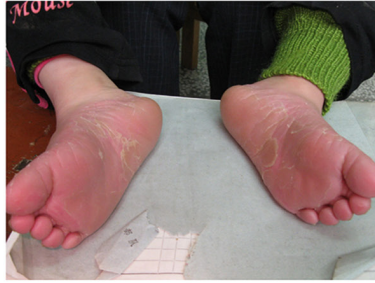

C

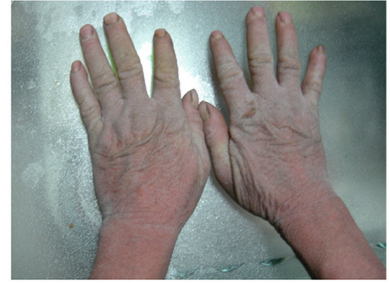

D

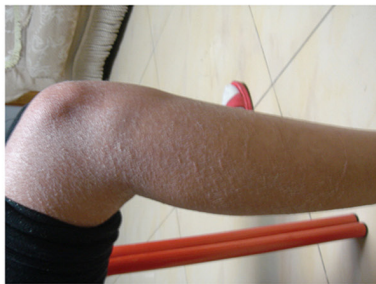

E

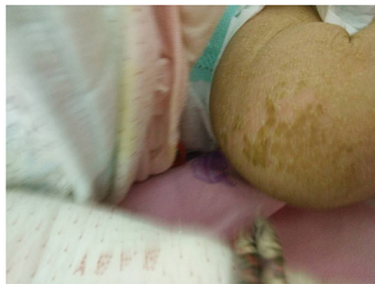

F

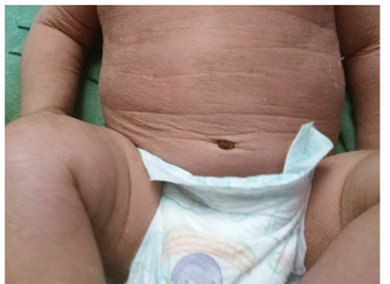

Supplement: Supplementary file 1 [file downloadSupplementary]
